# Supplementary material
Source: publisher figshare collection journal article supplement (https://gsajournals.figshare.com/ndownloader/files/13806437)
Supplement: Supplementary file 1 [file 13806437]

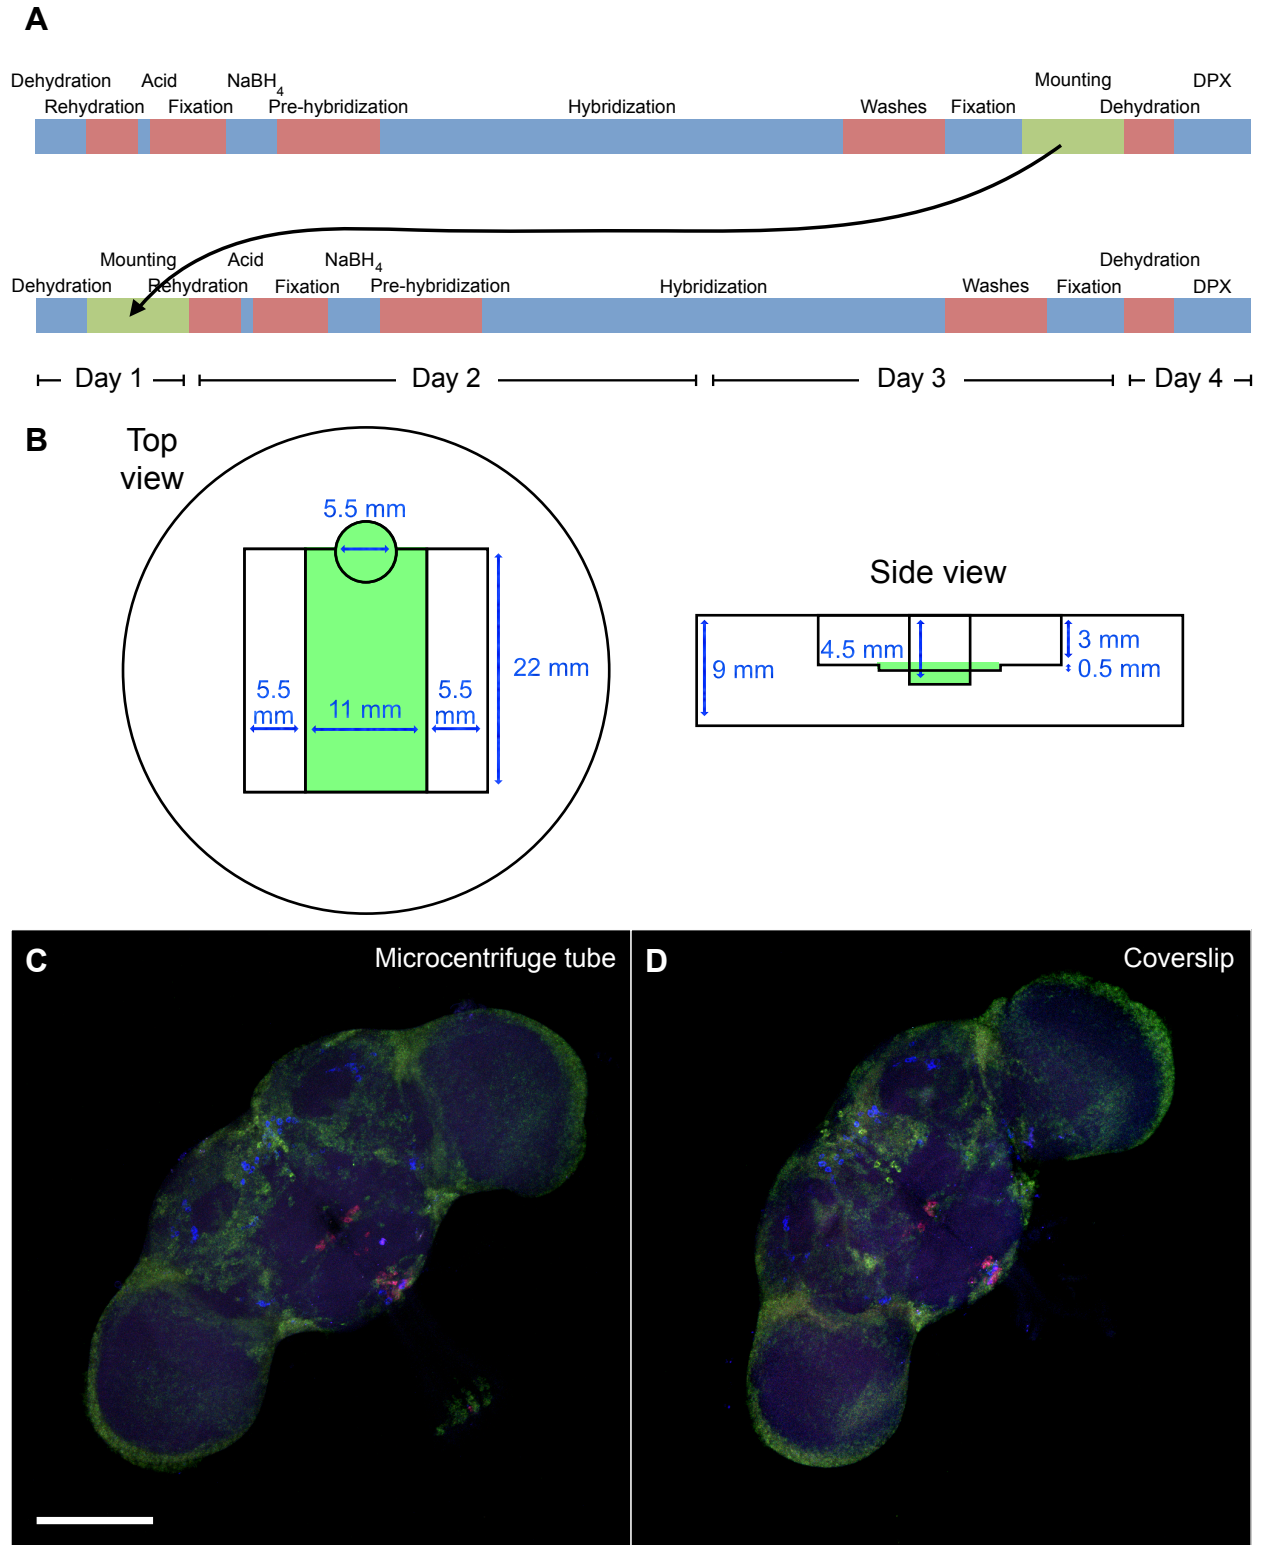

**Figure S5.** Comparison of the “microcentrifuge tube” and “coverslip” FISH protocols. (A) Timeline of FISH processing steps. Both protocols involve similar steps, but sample mounting is moved towards the beginning of the procedure in the coverslip protocol. This simplifies subsequent sample handling while maintaining the identity of many individual brains throughout the protocol. (B) Top and side view schematics of the hybridization chamber for the coverslip protocol. Area to be filled with hybridization solution is colored green. (C-D) The two protocols produce FISH labeling of similar quality. *Drosophila* brains were labeled with FISH probes for *ChAT* (Cy3; blue), *pale* (Cy5; green), and *Tbh* (AF594; red) mRNAs using either microcentrifuge tube (C), or coverslip (D) protocols.
